# Supplementary material
Source: Royal Society of Chemistry journal article supplement (doi:10.1039/d6tc00598e)
Supplement: d6tc00598e1.pdf [file d6tc00598e1.pdf]

Electronic Supplementary Information for:

# **Molecular Precursor-Directed Growth of Nanostructured SnS<sub>2</sub> for Memristive and Neuromorphic Electronics**

*Suprabha S. Dixit<sup>a</sup>, Trishala R. Desai<sup>a</sup>, Omesh Kapur<sup>b</sup>, Bohao Ding<sup>b</sup>, Ruomeng Huang<sup>b\*</sup>,  
Chitra Gurnani<sup>a\*</sup>*

<sup>a</sup>Department of Chemistry, Ecole Centrale School of Engineering, Mahindra University,  
Hyderabad-500043, India

<sup>b</sup>School of Electronics and Computer Science, University of Southampton, Southampton, UK

Corresponding Author Email:

<sup>a\*</sup>[chitra.gurnani@mahindrauniversity.edu.in](mailto:chitra.gurnani@mahindrauniversity.edu.in)

<sup>b\*</sup>[r.huang@soton.ac.uk](mailto:r.huang@soton.ac.uk)

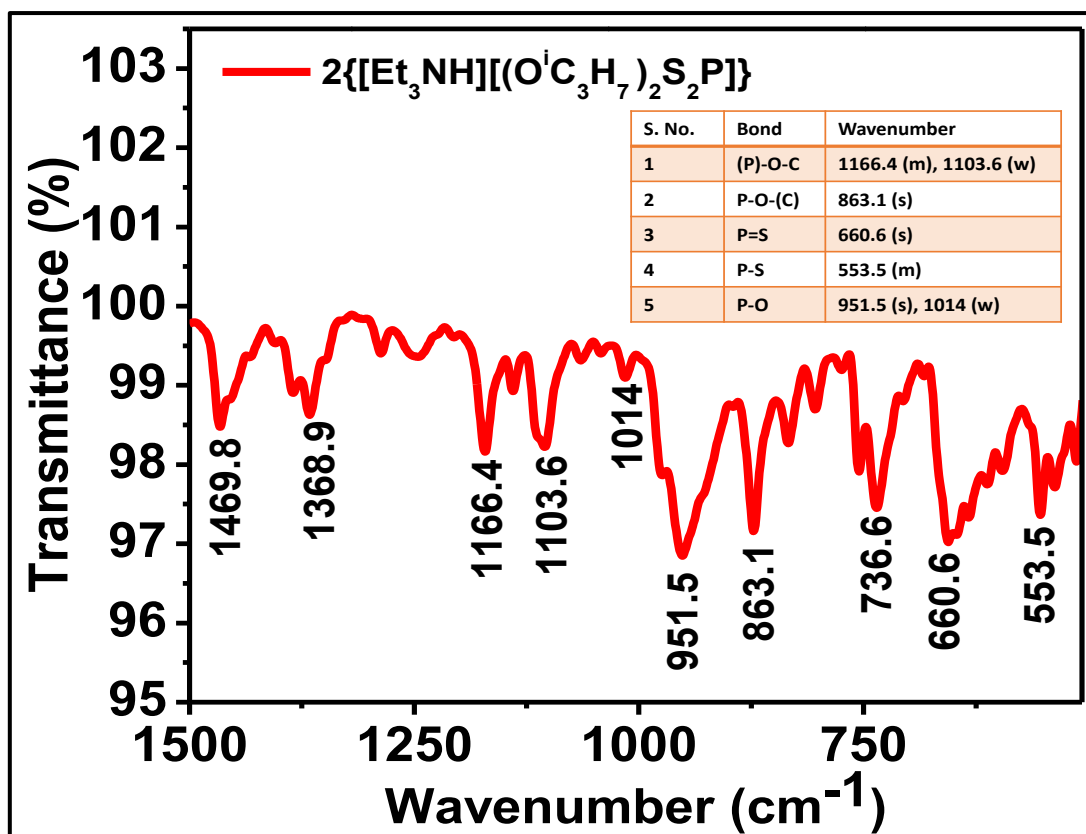

**Figure S1.** FT-IR spectrum of the [Et<sub>3</sub>NH][(O<sup>i</sup>C<sub>3</sub>H<sub>7</sub>)<sub>2</sub>S<sub>2</sub>P] using KBr discs

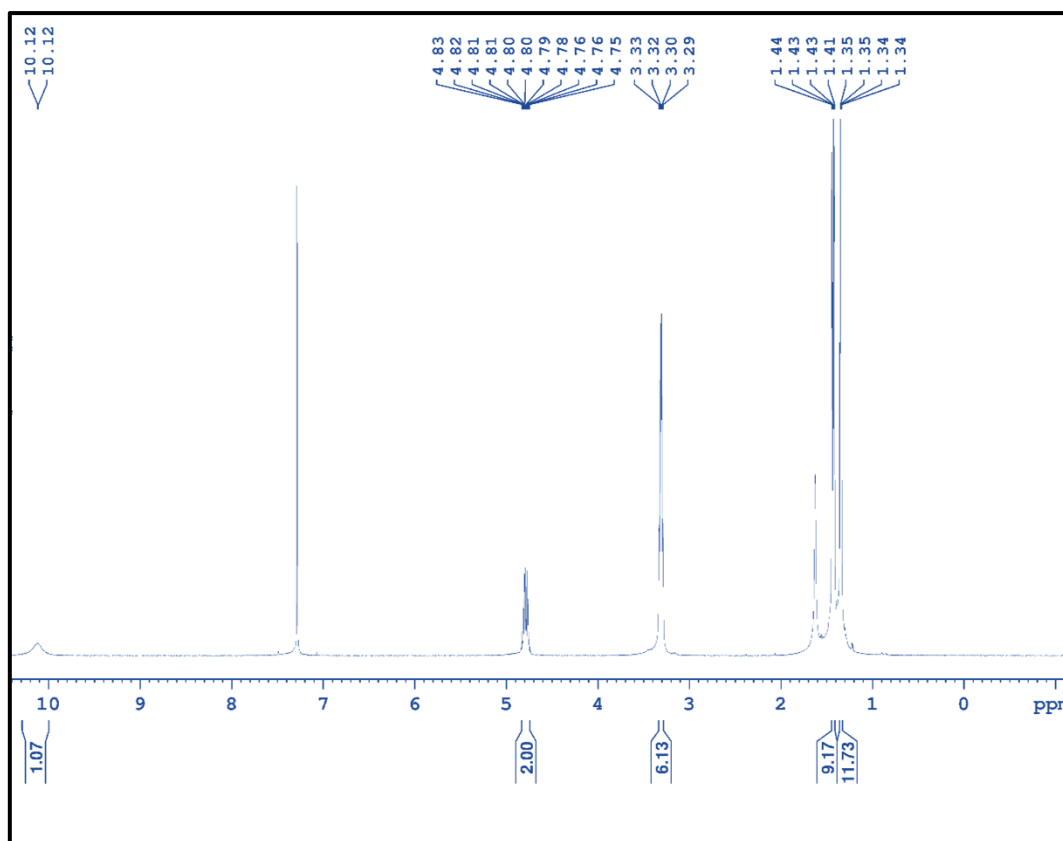

**Figure S2.** Room temperature  $\{^1\text{H}\}$  NMR spectrum of  $[\text{Et}_3\text{NH}][(\text{O}^i\text{C}_3\text{H}_7)_2\text{S}_2\text{P}]$  (in  $\text{CDCl}_3$ ).

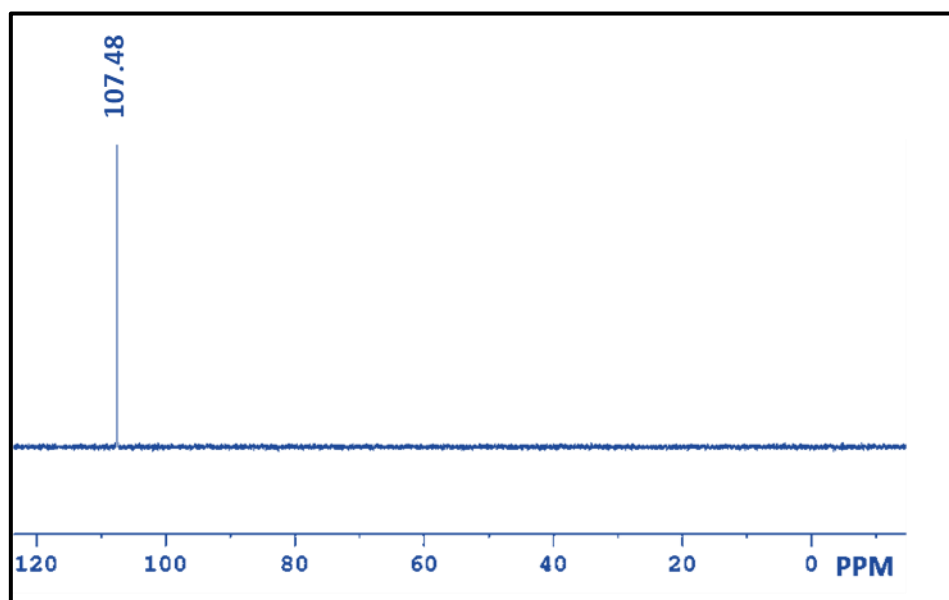

**Figure S3.** Room temperature  $^{31}\text{P}\{^1\text{H}\}$  NMR spectrum of  $[\text{Et}_3\text{NH}][(\text{O}^i\text{C}_3\text{H}_7)_2\text{S}_2\text{P}]$  (in  $\text{CDCl}_3$ ).

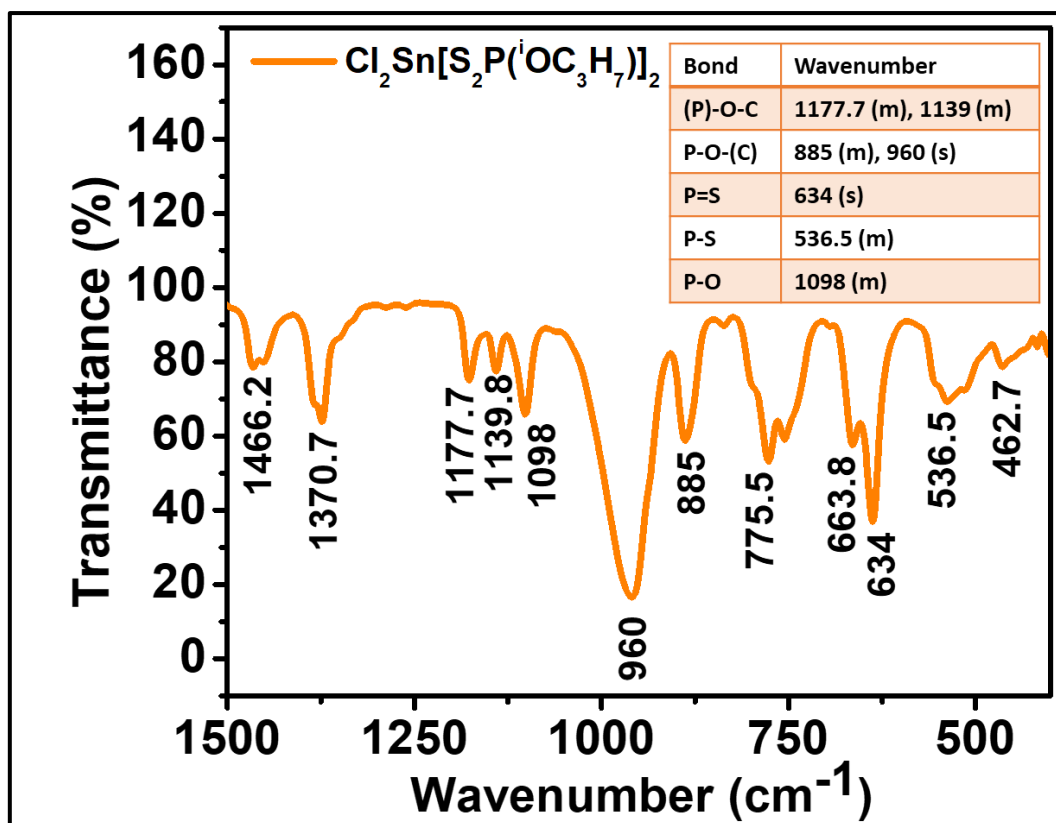

Figure S4. FT-IR spectrum of the  $\text{Cl}_2\text{Sn}[\text{S}_2\text{P}(\text{O}^i\text{C}_3\text{H}_7)]_2$  complex using KBr discs

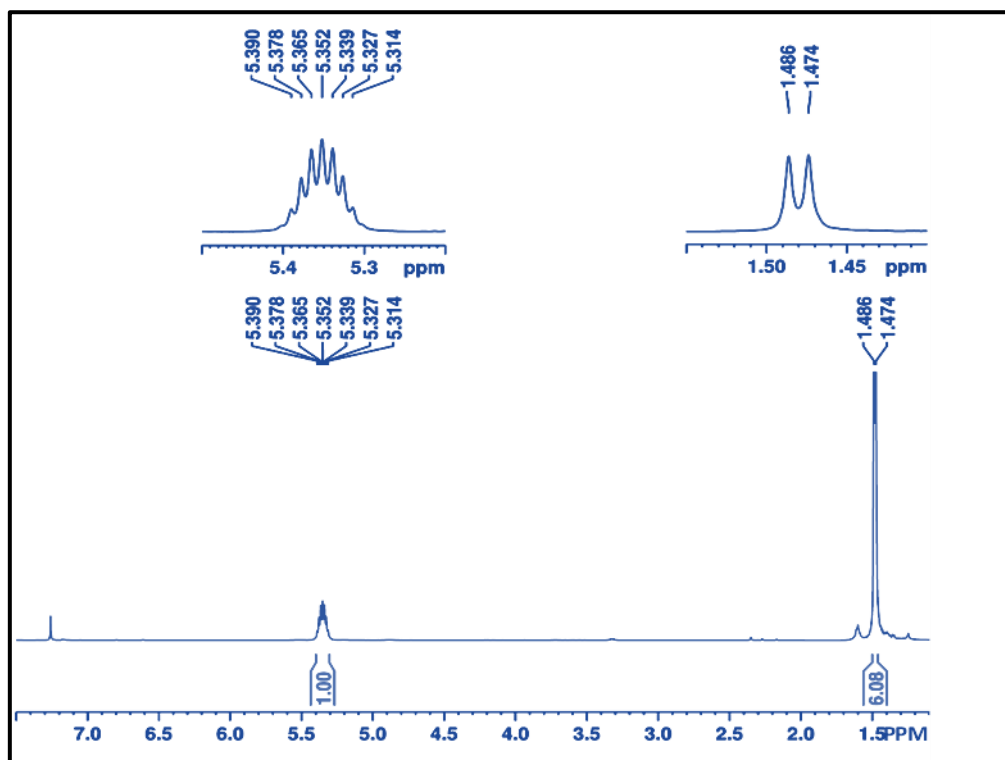

Figure S5. Room temperature  $\{^1\text{H}\}$  NMR spectrum of  $\text{Cl}_2\text{Sn}[\text{S}_2\text{P}(\text{O}^i\text{C}_3\text{H}_7)]_2$  complex (in  $\text{CDCl}_3$ ).

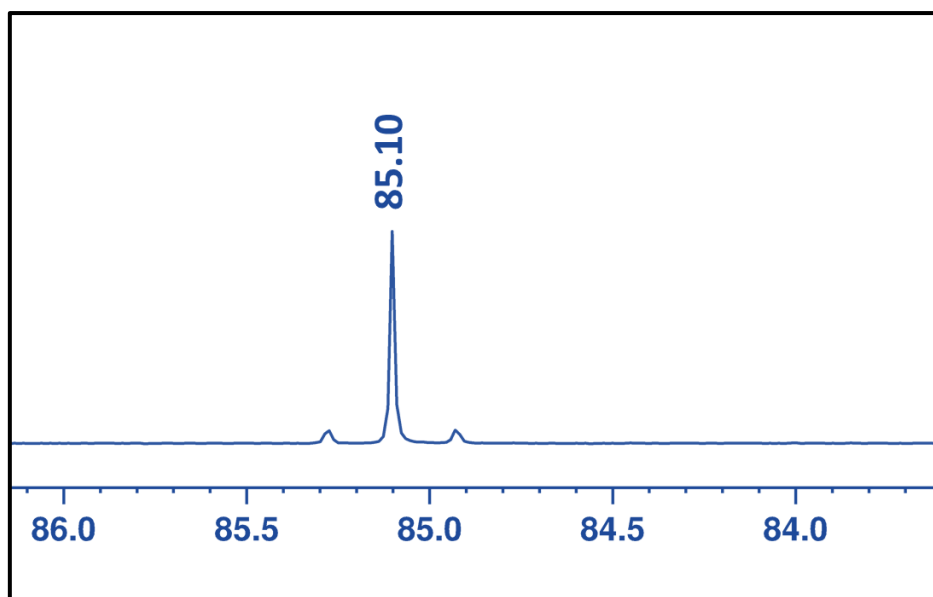

**Figure S6.** Room temperature  $^{31}\text{P}\{^1\text{H}\}$  NMR spectrum of  $\text{Cl}_2\text{Sn}[\text{S}_2\text{P}(\text{O}^i\text{C}_3\text{H}_7)]_2$  complex (in  $\text{CDCl}_3$ ).

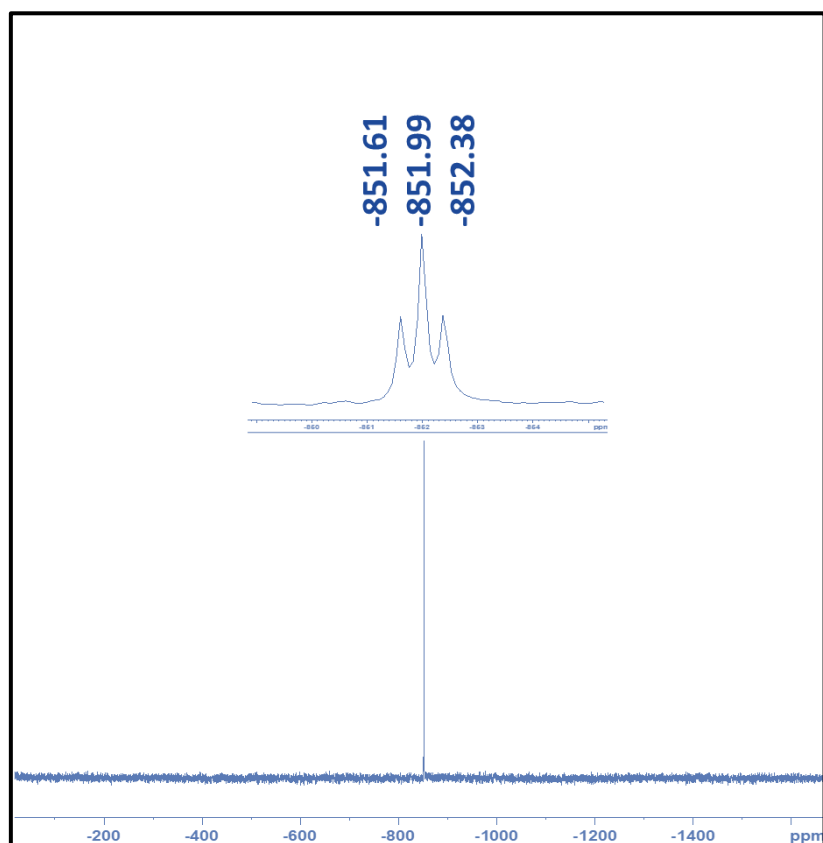

**Figure S7.** Room temperature  $^{119}\text{Sn}\{^1\text{H}\}$  NMR spectrum of  $\text{Cl}_2\text{Sn}[\text{S}_2\text{P}(\text{O}^i\text{C}_3\text{H}_7)]_2$  complex (in  $\text{CDCl}_3$ ).

**Table S1.** Crystal data and structure refinement for [Cl<sub>2</sub>Sn[S<sub>2</sub>P(O<sup>i</sup>C<sub>3</sub>H<sub>7</sub>)<sub>2</sub>]<sub>2</sub>].

| Parameter                                         | Value                                                                                           |
|---------------------------------------------------|-------------------------------------------------------------------------------------------------|
| Empirical formula                                 | C <sub>12</sub> H <sub>28</sub> Cl <sub>2</sub> O <sub>4</sub> P <sub>2</sub> S <sub>4</sub> Sn |
| Formula weight                                    | 616.11                                                                                          |
| Temperature (K)                                   | 156.0                                                                                           |
| Crystal system                                    | Orthorhombic                                                                                    |
| Space group                                       | C2221                                                                                           |
| a (Å)                                             | 9.9605(7)                                                                                       |
| b (Å)                                             | 18.5085(14)                                                                                     |
| c (Å)                                             | 28.902(2)                                                                                       |
| α (°)                                             | 90                                                                                              |
| β (°)                                             | 90                                                                                              |
| γ (°)                                             | 90                                                                                              |
| Volume (Å <sup>3</sup> )                          | 5328.1(7)                                                                                       |
| Z                                                 | 8                                                                                               |
| Density (ρ <sub>calc</sub> ) (g/cm <sup>3</sup> ) | 1.536                                                                                           |
| μ (mm <sup>-1</sup> )                             | 1.606                                                                                           |
| F(000)                                            | 2480.0                                                                                          |
| Crystal size (mm <sup>3</sup> )                   | 0.23 × 0.221 × 0.221                                                                            |
| Radiation                                         | MoKα (λ = 0.71073 Å)                                                                            |
| 2θ range for data collection (°)                  | 4.622 to 51.36                                                                                  |
| Index ranges                                      | -11 ≤ h ≤ 12, -22 ≤ k ≤ 21, -35 ≤ l ≤ 33                                                        |
| Reflections collected                             | 39408                                                                                           |
| Independent reflections                           | 5069 [R <sub>int</sub> = 0.0360, Rσ = 0.0231]                                                   |
| Data/restraints/parameters                        | 5069 / 160 / 223                                                                                |
| Goodness-of-fit on F <sup>2</sup>                 | 1.202                                                                                           |
| Final R indexes [I ≥ 2σ(I)]                       | R <sub>1</sub> = 0.0387, wR <sub>2</sub> = 0.0944                                               |
| Final R indexes [all data]                        | R <sub>1</sub> = 0.0401, wR <sub>2</sub> = 0.0952                                               |
| Largest diff. peak/hole (e Å <sup>-3</sup> )      | 0.81 / -0.66                                                                                    |
| Flack parameter                                   | 0.063(6)                                                                                        |

**Table S2: Bond lengths (Å) for [Cl<sub>2</sub>Sn[S<sub>2</sub>P(O<sup>i</sup>C<sub>3</sub>H<sub>7</sub>)<sub>2</sub>]<sub>2</sub>**

| Atom | Atom | Length (Å) | Atom | Atom | Length (Å) |
|------|------|------------|------|------|------------|
| Sn1  | S2   | 2.5993(15) | P005 | O1   | 1.556(4)   |
| Sn1  | S21  | 2.5994(15) | P006 | S3   | 2.022(3)   |
| Sn1  | S1   | 2.5138(16) | P006 | O4   | 1.561(5)   |
| Sn1  | S11  | 2.5138(16) | P006 | O3   | 1.555(5)   |
| Sn1  | Cl1  | 2.3894(19) | O2   | C4   | 1.475(7)   |
| Sn1  | Cl11 | 2.3894(19) | O1   | C1   | 1.483(7)   |
| Sn2  | S4   | 2.5983(16) | O4   | C10  | 1.472(11)  |
| Sn2  | S42  | 2.5983(16) | O3   | C7   | 1.461(9)   |
| Sn2  | S32  | 2.526(2)   | C7   | C8   | 1.484(17)  |
| Sn2  | S3   | 2.526(2)   | C7   | C9   | 1.515(14)  |
| Sn2  | Cl2  | 2.373(2)   | C1   | C2   | 1.521(12)  |
| Sn2  | Cl22 | 2.373(2)   | C1   | C3   | 1.482(12)  |
| S2   | P005 | 2.004(2)   | C4   | C5   | 1.496(15)  |
| S4   | P006 | 2.003(2)   | C4   | C6   | 1.491(15)  |
| P005 | S1   | 2.022(2)   | C12  | C10  | 1.483(14)  |
| P005 | O2   | 1.555(5)   | C11  | C10  | 1.459(13)  |

**Table S3: Bond angles (°) for [Cl<sub>2</sub>Sn[S<sub>2</sub>P(O<sup>i</sup>C<sub>3</sub>H<sub>7</sub>)]<sub>2</sub>**

| Atom             | Atom | Atom             | Angle/°    | Atom | Atom | Atom | Angle/°    |
|------------------|------|------------------|------------|------|------|------|------------|
| S2               | Sn1  | S2 <sup>1</sup>  | 88.14(7)   | P006 | S4   | Sn2  | 86.52(7)   |
| S1 <sup>1</sup>  | Sn1  | S2 <sup>1</sup>  | 78.65(6)   | S2   | P005 | S1   | 107.23(9)  |
| S1               | Sn1  | S2 <sup>1</sup>  | 92.72(6)   | O2   | P005 | S2   | 113.1(2)   |
| S1 <sup>1</sup>  | Sn1  | S2               | 92.72(6)   | O2   | P005 | S1   | 112.2(2)   |
| S1               | Sn1  | S2               | 78.65(6)   | O2   | P005 | O1   | 98.4(2)    |
| S1               | Sn1  | S1 <sup>1</sup>  | 168.06(9)  | O1   | P005 | S2   | 114.0(2)   |
| Cl1              | Sn1  | S2               | 90.39(7)   | O1   | P005 | S1   | 111.9(2)   |
| Cl1              | Sn1  | S2 <sup>1</sup>  | 168.59(6)  | S4   | P006 | S3   | 107.06(11) |
| Cl1 <sup>1</sup> | Sn1  | S2 <sup>1</sup>  | 90.39(7)   | O4   | P006 | S4   | 113.0(2)   |
| Cl1 <sup>1</sup> | Sn1  | S2               | 168.58(6)  | O4   | P006 | S3   | 112.4(2)   |
| Cl1              | Sn1  | S1 <sup>1</sup>  | 90.12(7)   | O3   | P006 | S4   | 112.8(2)   |
| Cl1              | Sn1  | S1               | 98.09(7)   | O3   | P006 | S3   | 112.8(3)   |
| Cl1 <sup>1</sup> | Sn1  | S1 <sup>1</sup>  | 98.09(7)   | O3   | P006 | O4   | 98.8(3)    |
| Cl1 <sup>1</sup> | Sn1  | S1               | 90.12(7)   | P005 | S1   | Sn1  | 88.02(7)   |
| Cl1              | Sn1  | Cl1 <sup>1</sup> | 93.23(12)  | P006 | S3   | Sn2  | 88.08(8)   |
| S4               | Sn2  | S4 <sup>2</sup>  | 89.15(7)   | C4   | O2   | P005 | 121.8(4)   |
| S3 <sup>2</sup>  | Sn2  | S4 <sup>2</sup>  | 78.33(6)   | C1   | O1   | P005 | 121.5(4)   |
| S3 <sup>2</sup>  | Sn2  | S4               | 90.92(6)   | C10  | O4   | P006 | 122.0(6)   |
| S3               | Sn2  | S4               | 78.33(6)   | C7   | O3   | P006 | 122.9(5)   |
| S3               | Sn2  | S4 <sup>2</sup>  | 90.92(6)   | O3   | C7   | C8   | 107.5(9)   |
| S3               | Sn2  | S3 <sup>2</sup>  | 164.97(10) | O3   | C7   | C9   | 106.1(8)   |
| Cl2 <sup>2</sup> | Sn2  | S4               | 169.76(9)  | C8   | C7   | C9   | 112.4(10)  |
| Cl2              | Sn2  | S4               | 90.28(7)   | O1   | C1   | C2   | 106.5(7)   |
| Cl2 <sup>2</sup> | Sn2  | S4 <sup>2</sup>  | 90.28(7)   | C3   | C1   | O1   | 107.6(6)   |
| Cl2              | Sn2  | S4 <sup>2</sup>  | 169.76(9)  | C3   | C1   | C2   | 113.0(7)   |
| Cl2              | Sn2  | S3               | 98.98(9)   | O2   | C4   | C5   | 106.5(7)   |
| Cl2 <sup>2</sup> | Sn2  | S3               | 91.46(10)  | O2   | C4   | C6   | 107.9(7)   |
| Cl2 <sup>2</sup> | Sn2  | S3 <sup>2</sup>  | 98.98(9)   | C6   | C4   | C5   | 112.4(8)   |
| Cl2              | Sn2  | S3 <sup>2</sup>  | 91.46(10)  | O4   | C10  | C12  | 107.0(9)   |
| Cl2              | Sn2  | Cl2 <sup>2</sup> | 92.09(13)  | C11  | C10  | O4   | 108.2(9)   |
| P005             | S2   | Sn1              | 86.05(7)   | C11  | C10  | C12  | 114.2(10)  |

**Table S4.** Comparative study of SSPs utilized for the deposition of SnS<sub>2</sub> thin films.

| Precursor                                                                                           | Synthesis Method and Deposition Condition | Need for Additional Sulphur Source | Sulphur Deficient Tin Sulphide | Device Integration      | Ref.      |
|-----------------------------------------------------------------------------------------------------|-------------------------------------------|------------------------------------|--------------------------------|-------------------------|-----------|
| <sup>n</sup> Bu <sub>2</sub> Sn(SnBu) <sub>2</sub>                                                  | AACVD + Annealing (440–460 °C)            | No                                 | Yes                            | Na-ion Battery          | 1         |
| SnCl <sub>4</sub> { <sup>n</sup> BuS(CH <sub>2</sub> ) <sub>3</sub> S <sup>m</sup> Bu}              | LPCVD (650 °C)                            | No                                 | No                             | Not explored            | 2         |
| <sup>n</sup> Bu <sub>2</sub> Sn(SnBu) <sub>2</sub>                                                  | LPCVD (440–530 °C)                        | No                                 | No                             | Thermoelectric          | 3         |
| Sn(SCH <sub>2</sub> CF <sub>3</sub> ) <sub>4</sub>                                                  | APCVD (≥300 °C)                           | Yes                                | No                             | Not explored            | 4         |
| Sn(S <sub>2</sub> CNEt <sub>2</sub> ) <sub>4</sub>                                                  | CVD (250–350 °C)                          | Yes                                | No                             | Not explored            | 5         |
| R <sub>n</sub> Sn[S <sub>2</sub> CN(C <sub>4</sub> H <sub>9</sub> )CH <sub>3</sub> ] <sub>4-n</sub> | APCVD+ Annealing                          | Yes                                | No                             | Not explored            | 6         |
| This work (DTP-based SSP)                                                                           | One-step solvothermal (200 °C)            | Not required                       | No                             | Memristor+ Neuromorphic | This work |

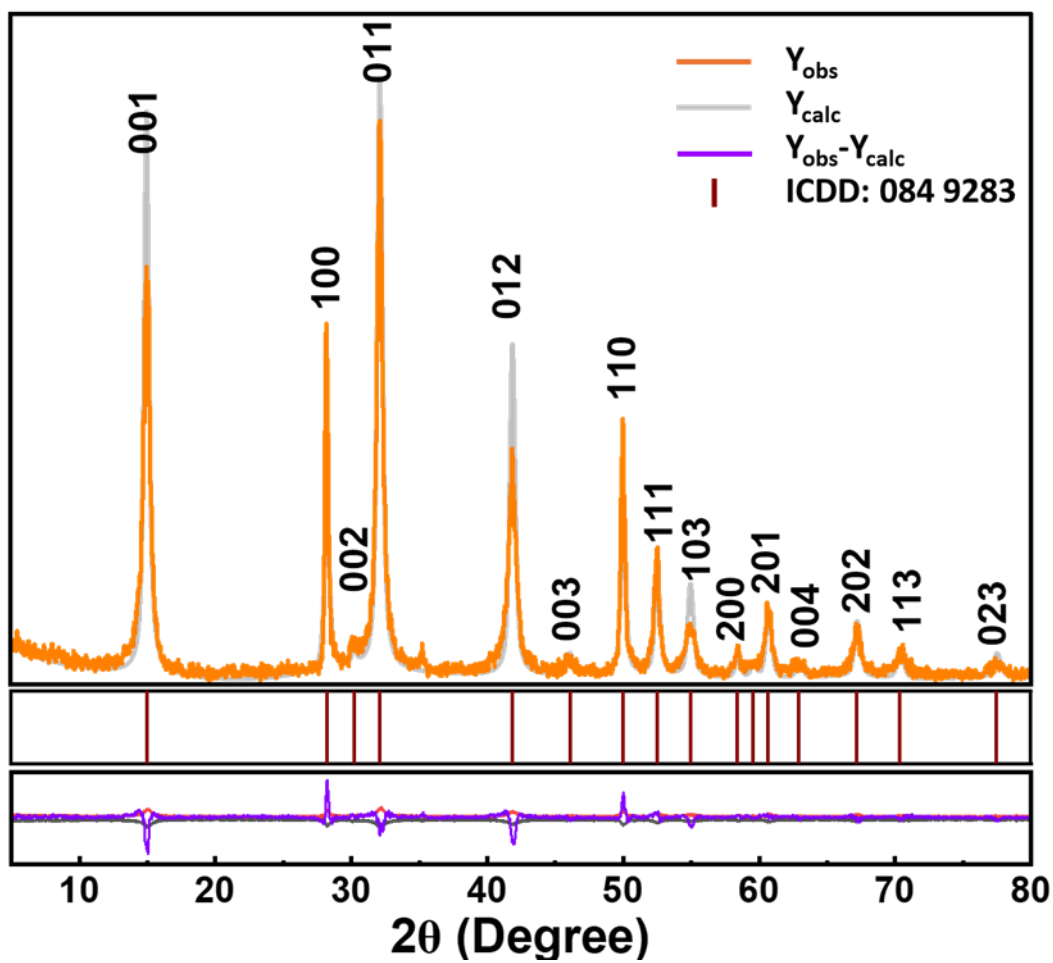

**Figure S8:** Rietveld refinement pattern of nanostructured SnS<sub>2</sub> thin film

**Table S5:** Microstrain ( $\epsilon$ ) values estimated from XRD peak broadening of SnS<sub>2</sub> thin film.

| Peak ( $2\theta$ ) | FWHM (deg) | Microstrain ( $\epsilon$ ) |
|--------------------|------------|----------------------------|
| 15.02              | 0.40422    | 0.0134                     |
| 28.27              | 0.28947    | 0.0050                     |
| 32.13              | 0.37345    | 0.0056                     |
| 41.89              | 0.50812    | 0.0058                     |
| 50.01              | 0.21850    | 0.0020                     |

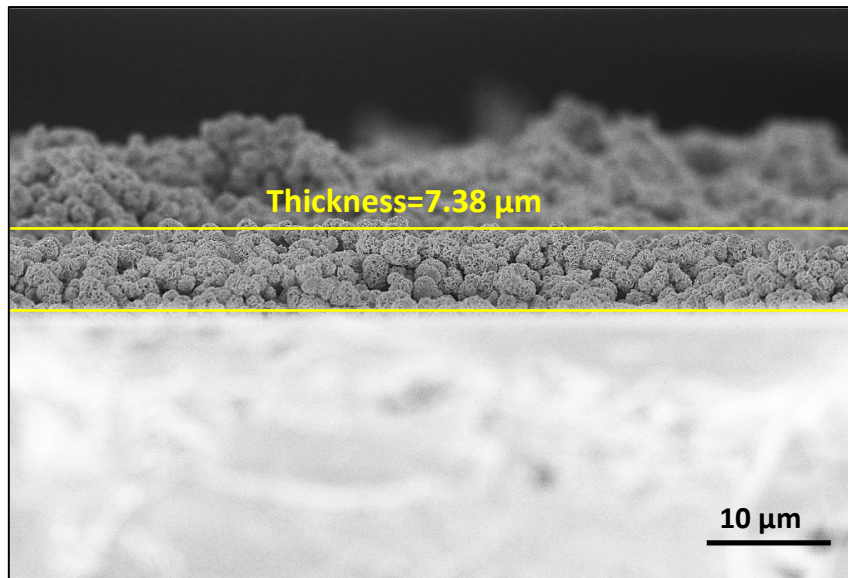

**Figure S9.** Cross-sectional micrograph of the SnS<sub>2</sub> nanostructured thin film, highlighting the film thickness

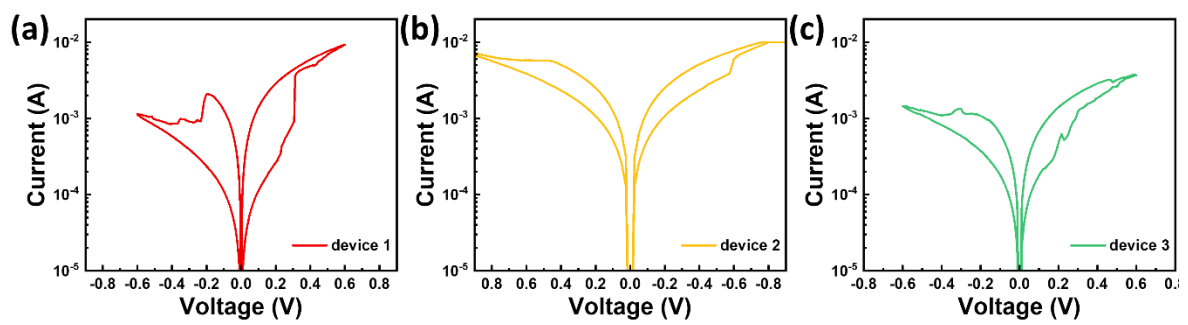

**Figure S10** DC I–V characteristics of three representative Ag/SnS<sub>2</sub>/ITO memristor devices, showing bipolar resistive switching behaviour with electroforming-free operation.

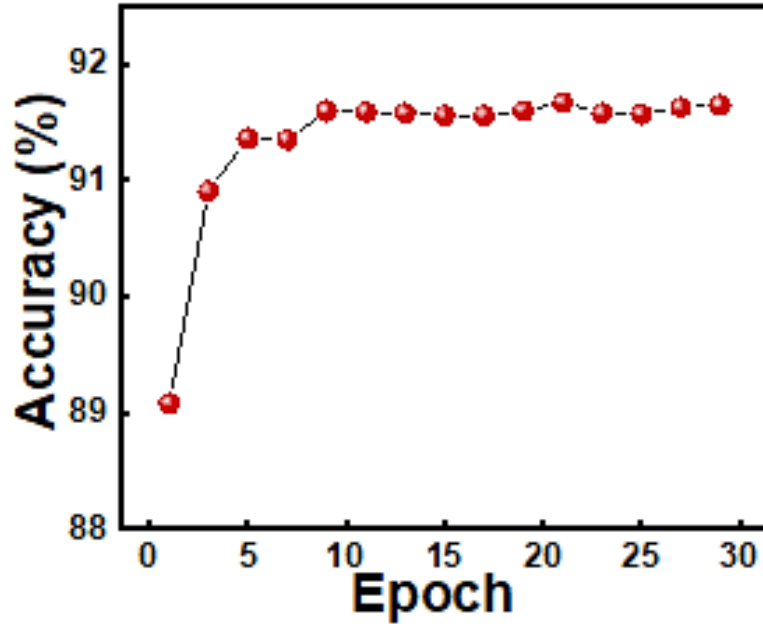

Figure S11. Validation accuracy as a function of training epoch.

Table S6. Comparison of the resistive switching performance of the Ag/SnS<sub>2</sub>/ITO memristor in this work against other SnS<sub>2</sub>-based memristors.

| Device                                             | Steps in Synthesis | Temperature | Switching Voltage | Electro-forming | Synaptic Switching | MNIST Accuracy | Ref.      |
|----------------------------------------------------|--------------------|-------------|-------------------|-----------------|--------------------|----------------|-----------|
| SnO <sub>x</sub> /SnS <sub>2</sub> Heterostructure | Multistep          | 250 °C      | ~1 V              | Yes             | Yes                | 90%            | 7         |
| SnS <sub>2</sub> Quantum Dots                      | Multistep          | 160–200 °C  | 0.7-1 V           | Yes             | No                 | Not explored   | 8         |
| SnS <sub>2</sub> -rGO Composite                    | Multistep          | 180–200 °C  | 2 V               | Yes             | Yes                | Not explored   | 9         |
| Ca <sup>2+</sup> -doped SnS <sub>2</sub>           | Multistep          | 180–220 °C  | 2-4 V             | Yes             | Yes                | 90%            | 10        |
| Ag/SnS <sub>2</sub> /ITO (This work)               | Multistep          | ~200 °C     | 0.6 V             | No              | Yes                | 92%            | This work |

## References:

- 1 Z. Zhu, G. Hyett, G. Reid, F. Robinson, G. Cibin and A. L. Hector, *Small Struct.*, 2023, **4**, 2200396.
- 2 C. Gurnani, S. L. Hawken, A. L. Hector, R. Huang, M. Jura, W. Levason, J. Perkins, G. Reid and G. B. G. Stenning, *Dalton Trans.*, 2018, **47**, 2628–2637.
- 3 F. Robinson, P. J. Curran, C. H. De Groot, D. Hardie, A. L. Hector, K. Holloway, R. Huang, D. Newbrook and G. Reid, *Mater. Adv.*, 2021, **2**, 4814–4823.
- 4 G. Barone, T. G. Hibbert, M. F. Mahon, K. C. Molloy, L. S. Price, I. P. Parkin, A. M. E. Hardy and M. N. Field, *J. Mater. Chem.*, 2001, **11**, 464–468.
- 5 G. Barone, T. Chaplin, T. G. Hibbert, A. T. Kana, M. F. Mahon, K. C. Molloy, I. D. Worsley, I. P. Parkin and L. S. Price, *J. Chem. Soc. Dalt. Trans.*, 2002, 1085–1092.
- 6 A. T. Kana, T. G. Hibbert, M. F. Mahon, K. C. Molloy, I. P. Parkin and L. S. Price, *Polyhedron*, 2001, **20**, 2989–2995.
- 7 Y. Wu, S. Li, Y. Ji, Z. Weng, H. Xing, L. Arauz, T. Hu, J. Hong, K. W. Ang and S. Liu, *Sci. China Mater.*, 2025, **68**, 581–589.
- 8 H. An, Y. Li, Y. Ren, Y. Wan, W. Wang, Z. Sun, J. Zhong and Z. Peng, *Nanoscale*, 2024, **16**, 12142–12148.
- 9 E. K. Jang, Y. Park and J. S. Lee, *Nanoscale*, 2019, **11**, 15382–15388.
- 10 J. Feng, J. Fan, Z. Zhang, Y. Gao, S. Xue, G. Cai and J. S. Zhao, *Adv. Funct. Mater.*, 2024, **34**, 2401228.
